# Supplementary material
Source: PubMed Central journal article supplement (PMC5818855)
Supplement: jama-318-1260-s001.pdf [file jama-318-1260-s001.pdf]

## Supplementary Online Content

Wallis CJD, Juvet T, Lee Y, et al. Association between use of antithrombotic medication and hematuria-related complications. *JAMA*. doi:10.1001/JAMA.2017.13890

**eFigure.** Schematic of Time-Varying Intermittent Exposure to Antithrombotic Medications, Illustrating the Calculation of Incidence Density Rates.

**eTable 1.** Medications Included in Exposure Definition.

**eTable 2.** Outcome Definitions.

**eTable 3.** Validation of Administrative Data Sources.

**eTable 4.** Medications Included in BPH Medication Exposure.

**eTable 5.** Sensitivity Analysis: Multivariable Negative Binomial Regression Models Assessing the Association Between Exposure to Antithrombotic Agents (Primary Exposure) and Hematuria-Related Complications, Using a limited definition of Urologic Procedures (Study Interval Between 2002-2014).

**eTable 6.** Standardized Incidence Ratios (SIR) of Potential Outcomes of Hematuria-Related Investigations (Study Interval Between 2002-2014).

**eTable 7.** Continuous Length of Time That Patients Spend on Each Drug.

This supplementary material has been provided by the authors to give readers additional information about their work.

**eFigure.** Schematic of Time-Varying Intermittent Exposure to Antithrombotic Medications, Illustrating the Calculation of Incidence Density Rates. Stippled area refers to time during which the patient in question was not exposed to an antithrombotic medication. The dark shaded area refers to time during which the patient was actively exposed to antithrombotic medications based on an active prescription. The “x” refer to hematuria-related events. Events are attributed to the exposure status (exposed or unexposed) immediately above the “x”. The column on the right refers to the calculation of incidence density rates (IDR).

(A) Example of a patient who was never exposed to antithrombotic medications during the study interval. (B) Example of a patient who began an antithrombotic medication partway through the study interval. (C) Example of a patient who used antithrombotic medications intermittently throughout the study interval. (D) Example of a patient who switched antithrombotic medications during the study interval. (E) Example of a patient taking more than one antithrombotic medication concurrently.

IDR = events/exposure time

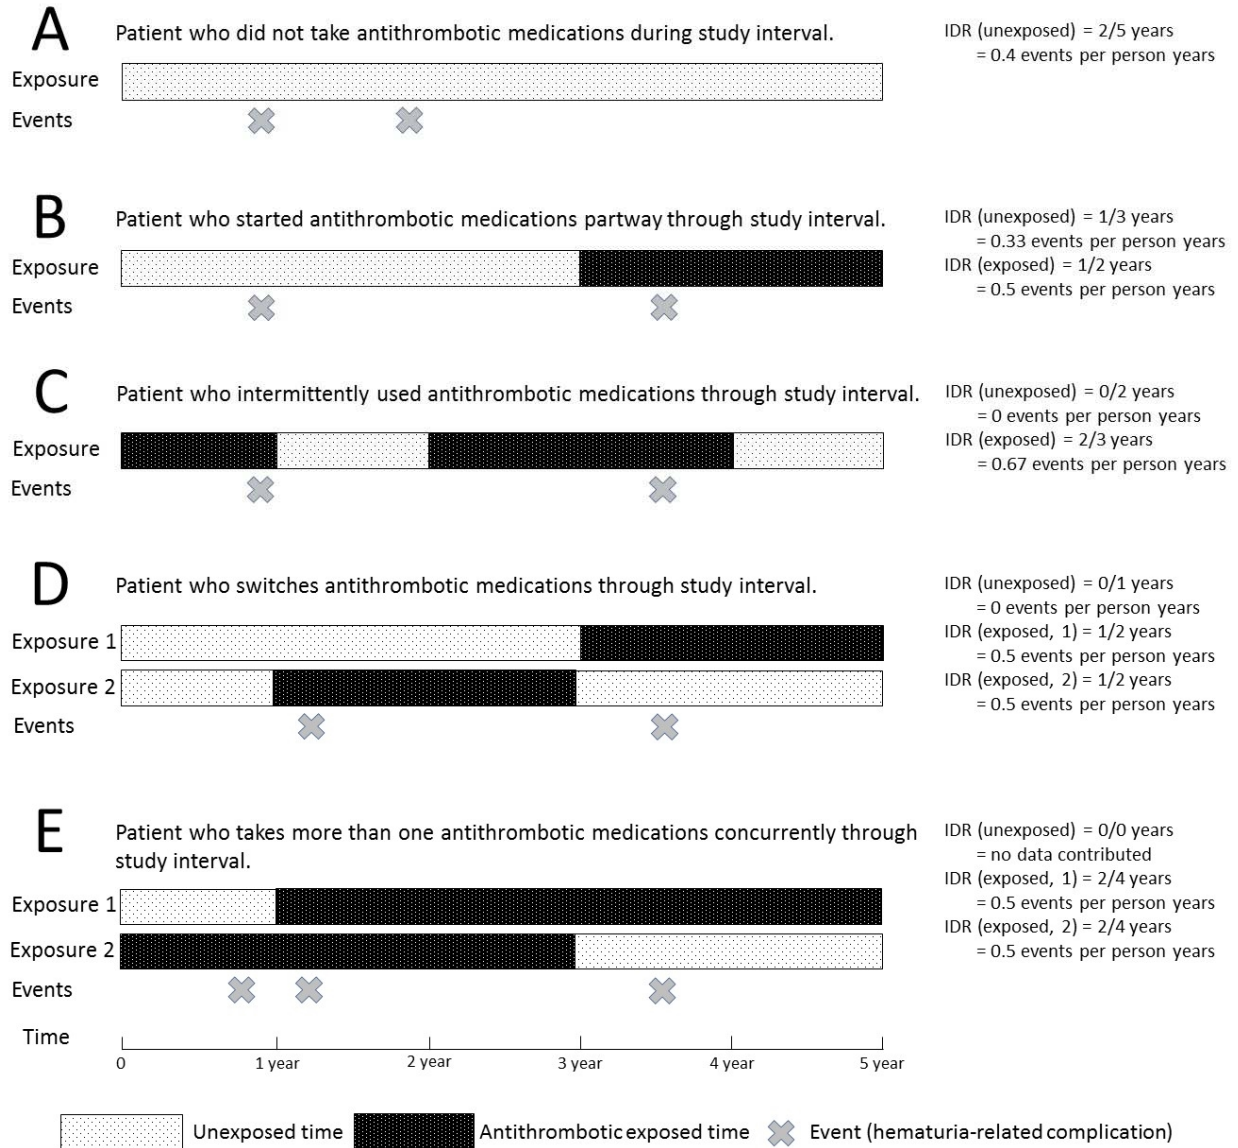

Note: IDR = incidence density rate.

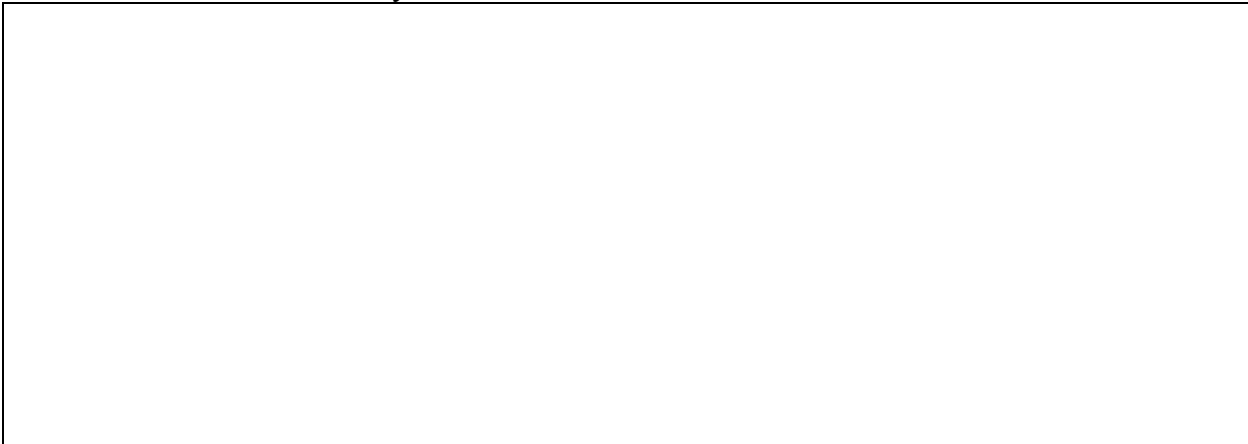

**eTable 1. Medications Included in Exposure Definition**

| Medication                           | Drug Identification Numbers                                                                                                                                                                                                                                                                                                                                                                                                                                                                                                                                                                                                                                                                                                                                                                                                                                                                                                                                                                                                                                                                                                                                                                                                                                                                                                                                                                                                                                                                                                                                                                                                                                                                                                                                                                                                                                                                                                                                                                                                                                                                                                                                                                                                                                              |
|--------------------------------------|--------------------------------------------------------------------------------------------------------------------------------------------------------------------------------------------------------------------------------------------------------------------------------------------------------------------------------------------------------------------------------------------------------------------------------------------------------------------------------------------------------------------------------------------------------------------------------------------------------------------------------------------------------------------------------------------------------------------------------------------------------------------------------------------------------------------------------------------------------------------------------------------------------------------------------------------------------------------------------------------------------------------------------------------------------------------------------------------------------------------------------------------------------------------------------------------------------------------------------------------------------------------------------------------------------------------------------------------------------------------------------------------------------------------------------------------------------------------------------------------------------------------------------------------------------------------------------------------------------------------------------------------------------------------------------------------------------------------------------------------------------------------------------------------------------------------------------------------------------------------------------------------------------------------------------------------------------------------------------------------------------------------------------------------------------------------------------------------------------------------------------------------------------------------------------------------------------------------------------------------------------------------------|
| <b>ANTI-PLATELET AGENTS</b>          |                                                                                                                                                                                                                                                                                                                                                                                                                                                                                                                                                                                                                                                                                                                                                                                                                                                                                                                                                                                                                                                                                                                                                                                                                                                                                                                                                                                                                                                                                                                                                                                                                                                                                                                                                                                                                                                                                                                                                                                                                                                                                                                                                                                                                                                                          |
| Acetylsalicylic acid (ASA)<br>>82 mg | <a href="#">02234510</a> , <a href="#">00180041</a> , <a href="#">01922246</a> , <a href="#">02245443</a> , <a href="#">02252856</a> , <a href="#">02303299</a> , <a href="#">02238645</a> , <a href="#">02252864</a> , <a href="#">00718831</a> , <a href="#">02246103</a> , <a href="#">00095494</a> , <a href="#">02152746</a> , <a href="#">02245367</a> , <a href="#">02332450</a> , <a href="#">02332469</a> , <a href="#">00472468</a> , <a href="#">00530336</a> , <a href="#">02270323</a> , <a href="#">02387492</a> , <a href="#">00785547</a> , <a href="#">00582867</a> , <a href="#">02247550</a> , <a href="#">02352427</a> , <a href="#">02352435</a> , <a href="#">02150425</a> , <a href="#">02150417</a> , <a href="#">02150336</a> , <a href="#">02150328</a> , <a href="#">02316897</a> , <a href="#">02316889</a> , <a href="#">02238670</a> , <a href="#">02264706</a> , <a href="#">02264722</a> , <a href="#">02292726</a> , <a href="#">00510696</a> , <a href="#">02010526</a> , <a href="#">00472476</a> , <a href="#">00794244</a> , <a href="#">02050161</a> , <a href="#">00010332</a> , <a href="#">01905392</a> , <a href="#">00852015</a> , <a href="#">00010340</a> , <a href="#">00419508</a> , <a href="#">02245729</a> , <a href="#">02252228</a> , <a href="#">02426625</a> , <a href="#">00226327</a> , <a href="#">00176206</a> , <a href="#">00176192</a> , <a href="#">00800511</a> , <a href="#">02242978</a> , <a href="#">01966375</a> , <a href="#">01966367</a> , <a href="#">01941895</a> , <a href="#">02252201</a> , <a href="#">02243051</a> , <a href="#">02237579</a> , <a href="#">02239741</a> , <a href="#">02251906</a> , <a href="#">02351544</a> , <a href="#">00216666</a> , <a href="#">00229296</a> , <a href="#">00040851</a> , <a href="#">02284529</a> , <a href="#">02284537</a> , <a href="#">02285371</a> , <a href="#">02229736</a> , <a href="#">00608157</a> , <a href="#">00608211</a> , <a href="#">00608238</a> , <a href="#">00608181</a> , <a href="#">00608203</a> , <a href="#">02245887</a> , <a href="#">01934791</a> , <a href="#">01934783</a> , <a href="#">02230949</a> , <a href="#">01971417</a> , <a href="#">02242406</a> , <a href="#">01971387</a> , <a href="#">01971409</a> |
| Dipyridamole                         | <a href="#">02242119</a> , <a href="#">00895644</a> , <a href="#">00895652</a> , <a href="#">00895660</a> , <a href="#">00571237</a> , <a href="#">00571245</a> , <a href="#">00601845</a>                                                                                                                                                                                                                                                                                                                                                                                                                                                                                                                                                                                                                                                                                                                                                                                                                                                                                                                                                                                                                                                                                                                                                                                                                                                                                                                                                                                                                                                                                                                                                                                                                                                                                                                                                                                                                                                                                                                                                                                                                                                                               |
| Clopidogrel                          | <a href="#">02303027</a> , <a href="#">02252767</a> , <a href="#">02398591</a> , <a href="#">02416387</a> , <a href="#">02385813</a> , <a href="#">02394820</a> , <a href="#">02400553</a> , <a href="#">02378507</a> , <a href="#">02415550</a> , <a href="#">02422255</a> , <a href="#">02408910</a> , <a href="#">02351536</a> , <a href="#">02238682</a> , <a href="#">02330555</a> , <a href="#">02348004</a> , <a href="#">02379813</a> , <a href="#">02379819</a> , <a href="#">02359316</a> , <a href="#">02293161</a> , <a href="#">02388065</a>                                                                                                                                                                                                                                                                                                                                                                                                                                                                                                                                                                                                                                                                                                                                                                                                                                                                                                                                                                                                                                                                                                                                                                                                                                                                                                                                                                                                                                                                                                                                                                                                                                                                                                                |
| Prasugrel                            | <a href="#">02349124</a>                                                                                                                                                                                                                                                                                                                                                                                                                                                                                                                                                                                                                                                                                                                                                                                                                                                                                                                                                                                                                                                                                                                                                                                                                                                                                                                                                                                                                                                                                                                                                                                                                                                                                                                                                                                                                                                                                                                                                                                                                                                                                                                                                                                                                                                 |
| Ticagrelor                           | <a href="#">02368544</a> , <a href="#">02455005</a>                                                                                                                                                                                                                                                                                                                                                                                                                                                                                                                                                                                                                                                                                                                                                                                                                                                                                                                                                                                                                                                                                                                                                                                                                                                                                                                                                                                                                                                                                                                                                                                                                                                                                                                                                                                                                                                                                                                                                                                                                                                                                                                                                                                                                      |
| Ticlopidine                          | <a href="#">02237701</a> , <a href="#">02243808</a> , <a href="#">02239744</a> , <a href="#">02243327</a> , <a href="#">02236848</a>                                                                                                                                                                                                                                                                                                                                                                                                                                                                                                                                                                                                                                                                                                                                                                                                                                                                                                                                                                                                                                                                                                                                                                                                                                                                                                                                                                                                                                                                                                                                                                                                                                                                                                                                                                                                                                                                                                                                                                                                                                                                                                                                     |
| <b>ORAL ANTICOAGULANTS</b>           |                                                                                                                                                                                                                                                                                                                                                                                                                                                                                                                                                                                                                                                                                                                                                                                                                                                                                                                                                                                                                                                                                                                                                                                                                                                                                                                                                                                                                                                                                                                                                                                                                                                                                                                                                                                                                                                                                                                                                                                                                                                                                                                                                                                                                                                                          |
| Warfarin                             | <a href="#">02242924</a> , <a href="#">02242925</a> , <a href="#">02242926</a> , <a href="#">02242927</a> , <a href="#">02242928</a> , <a href="#">02242929</a> , <a href="#">02245618</a> , <a href="#">01918362</a> , <a href="#">01918311</a> , <a href="#">01918346</a> , <a href="#">01918338</a> , <a href="#">02240205</a> , <a href="#">02007959</a> , <a href="#">01918354</a> , <a href="#">02240206</a> , <a href="#">02244462</a> , <a href="#">02244463</a> , <a href="#">02244464</a> , <a href="#">02244465</a> , <a href="#">02244466</a> , <a href="#">02244467</a> , <a href="#">02287498</a> , <a href="#">02287501</a> , <a href="#">02287528</a> , <a href="#">02242680</a> , <a href="#">02242681</a> , <a href="#">02242682</a> , <a href="#">02242683</a> , <a href="#">02242684</a> , <a href="#">02242685</a> , <a href="#">02242686</a> , <a href="#">02242687</a> , <a href="#">02242697</a>                                                                                                                                                                                                                                                                                                                                                                                                                                                                                                                                                                                                                                                                                                                                                                                                                                                                                                                                                                                                                                                                                                                                                                                                                                                                                                                                                 |
| Rivaroxaban                          | <a href="#">02316986</a> , <a href="#">02378604</a> , <a href="#">02378612</a> , <a href="#">02441535</a>                                                                                                                                                                                                                                                                                                                                                                                                                                                                                                                                                                                                                                                                                                                                                                                                                                                                                                                                                                                                                                                                                                                                                                                                                                                                                                                                                                                                                                                                                                                                                                                                                                                                                                                                                                                                                                                                                                                                                                                                                                                                                                                                                                |
| Dabigatran                           | <a href="#">02312433</a> , <a href="#">02312441</a> , <a href="#">02358808</a>                                                                                                                                                                                                                                                                                                                                                                                                                                                                                                                                                                                                                                                                                                                                                                                                                                                                                                                                                                                                                                                                                                                                                                                                                                                                                                                                                                                                                                                                                                                                                                                                                                                                                                                                                                                                                                                                                                                                                                                                                                                                                                                                                                                           |
| Apixaban                             | <a href="#">02377233</a> , <a href="#">02397714</a>                                                                                                                                                                                                                                                                                                                                                                                                                                                                                                                                                                                                                                                                                                                                                                                                                                                                                                                                                                                                                                                                                                                                                                                                                                                                                                                                                                                                                                                                                                                                                                                                                                                                                                                                                                                                                                                                                                                                                                                                                                                                                                                                                                                                                      |

| <b>eTable 2. Outcome Definitions</b> |                        |                   |                                                                 |
|--------------------------------------|------------------------|-------------------|-----------------------------------------------------------------|
|                                      | ICD-10 diagnostic code | OHIP billing code | Canadian Classification of Health Interventions procedural code |
| Gross hematuria                      | R31.0                  |                   |                                                                 |
| Cystoscopy                           |                        | Z606, Z607        | 2.PM.70.BA                                                      |
| Clot removal/irrigation              |                        | Z608, E783        | 1.PM.54.CA-TS                                                   |
| Control of bladder bleeding          |                        |                   | 1.PM.13.BA-Z9, BA-C2                                            |
| Catheterization                      |                        | Z611              | 1.PM.52.BA-TS, CA-TS                                            |

| <b>eTable 3.</b> Validation of Administrative Data Sources |                                                                                                                                                                                                        |                                                                                                                                                                                                                                                                                                         |
|------------------------------------------------------------|--------------------------------------------------------------------------------------------------------------------------------------------------------------------------------------------------------|---------------------------------------------------------------------------------------------------------------------------------------------------------------------------------------------------------------------------------------------------------------------------------------------------------|
| Data source                                                | Accuracy                                                                                                                                                                                               | Validation study                                                                                                                                                                                                                                                                                        |
| Ontario Drug Benefit                                       | 0.7% error rate                                                                                                                                                                                        | Levy et al. <i>Can J Clin Pharmacol.</i> 2003;10(2):67.                                                                                                                                                                                                                                                 |
| CIHI Discharge Abstract Database                           | Agreement with chart abstraction:<br>-demographics: 95-100%<br>-diagnoses:<br>1. median kappa 0.81 (IQR 0.70-0.87)<br>2. median sensitivity 0.82 (IQR 0.71-0.89)<br>3. median PPV 0.82 (IQR 0.84-0.89) | Juurlink et al. <i>Canadian Institute for Health Information Discharge Abstract Database: A validation study.</i> Toronto, Ontario, Canada: Institute for Clinical Evaluation Sciences; 2006                                                                                                            |
| OHIP database                                              | Data completeness 99%<br>Agreement with chart abstraction:<br>-primary diagnosis: 81-96%<br>-procedures: 88-96%                                                                                        | Williams and Young. A summary of studies on the quality of health care administrative databases in Canada. In: Goel V, Williams J, Anderson G, al. E, eds. <i>Patterns of Health Care in Ontario, Canada: The ICES Practice Atlas.</i> Ottawa, Ontario, Canada: Canadian Medical Association; 1996:339. |
| Ontario Cancer Registry                                    | Greater than 95% complete                                                                                                                                                                              | Robles et al. <i>J Clin Epi.</i> 1988;41(5):495.                                                                                                                                                                                                                                                        |

| <b>eTable 4. Medications Included in BPH Medication Exposure</b> |                                                                                                                                                                                                                                                                                                                                                            |
|------------------------------------------------------------------|------------------------------------------------------------------------------------------------------------------------------------------------------------------------------------------------------------------------------------------------------------------------------------------------------------------------------------------------------------|
| <b>Medication</b>                                                | <b>Drug Identification Numbers</b>                                                                                                                                                                                                                                                                                                                         |
| <b>ALPHA-BLOCKERS</b>                                            |                                                                                                                                                                                                                                                                                                                                                            |
| Silodosin                                                        | 2361663, 2361671                                                                                                                                                                                                                                                                                                                                           |
| Tamsulosin                                                       | 2238123, 2270102, 2281392, 2294265, 2294885, 2295121, 2298570, 2319217, 2331780, 2340208, 2352419, 2362406, 2366231, 2368242, 2413612, 2427117, 2429667                                                                                                                                                                                                    |
| Alfuzosin                                                        | 2245565, 2304678, 2314282, 2315866, 2414759, 2443201, 2447576                                                                                                                                                                                                                                                                                              |
| Terazosin                                                        | 2396289, 2350475, 2246544, 2218941, 2237476, 2243518, 2234502, 2233047, 2230805, 2350483, 2396297, 2230806, 818682, 2230806, 2233048, 2234503, 2243519, 2243747, 2237477, 2218968, 2218976, 2237478, 2243520, 2234504, 2233049, 2230807, 818666, 2396300, 2350491, 2218984, 2230808, 2233050, 2234505, 2243521, 2243749, 2218984, 2350505, 2396319, 818674 |
| Doxazosin                                                        | 2240498, 2240588, 2242728, 2243215, 2244527, 2240978, 2246332, 1958100, 2246333, 2240979, 2244528, 2243216, 2242729, 2240589, 2240499, 1958097, 2240500, 1958119, 2240590, 2242730, 2243217, 2244529, 2240980, 2246334                                                                                                                                     |
| <b>5-ALPHA REDUCATASE INHIBITORS</b>                             |                                                                                                                                                                                                                                                                                                                                                            |
| Finasteride                                                      | 2428741, 2445077, 2447541, 2447568, 2405814, 2348888, 2322579, 2306905, 2348500, 2356058, 2355043, 2354462, 2357224, 2350270, 2365383, 2371820, 2389878, 2010909                                                                                                                                                                                           |
| Dutasteride                                                      | 2404206, 2408287, 2393220, 2412691, 2424444, 2428873, 2416298, 2421712, 2443058, 2427753, 2434369, 2247813                                                                                                                                                                                                                                                 |

**eTable 5.** Sensitivity Analysis: Multivariable Negative Binomial Regression Models Assessing the Association Between Exposure to Antithrombotic Agents (Primary Exposure) and Hematuria-Related Complications, Using a limited definition of Urologic Procedures (Study Interval Between 2002-2014). Incidence density rates expressed as the number of events per 1000 person-years. Rate ratios comparing antithrombotic exposed and unexposed periods, with stratification by patient age due to a significant interaction between these two variables.

|                                           | Effect of antithrombotic medication exposure, stratified by age at prescription |         |                          |         |                          |         |                          |         |                          |         |
|-------------------------------------------|---------------------------------------------------------------------------------|---------|--------------------------|---------|--------------------------|---------|--------------------------|---------|--------------------------|---------|
|                                           | Patients 66-69 years                                                            |         | Patients 70-74 years     |         | Patients 75-79 years     |         | Patients 80-84 years     |         | Patients ≥85 years       |         |
|                                           | Unexposed                                                                       | Exposed | Unexposed                | Exposed | Unexposed                | Exposed | Unexposed                | Exposed | Unexposed                | Exposed |
| Sample size                               | 1,254,546                                                                       | 388,435 | 180,692                  | 158,444 | 127,262                  | 130,623 | 77,235                   | 80,197  | 69,432                   | 51,194  |
| Exposure time (person-years)              | 9,166,367                                                                       | 563,189 | 2,966,576                | 605,332 | 2,008,765                | 607,366 | 1,082,624                | 473,134 | 640,373                  | 351,500 |
| <b>Any hematuria-related complication</b> |                                                                                 |         |                          |         |                          |         |                          |         |                          |         |
| Number of events                          | 593,897                                                                         | 53,291  | 241,846                  | 68,316  | 163,409                  | 73,767  | 82,443                   | 54,698  | 38,804                   | 32,343  |
| Incidence density rate                    | 64.791                                                                          | 94.624  | 81.524                   | 112.857 | 81.348                   | 121.454 | 76.151                   | 115.608 | 60.596                   | 92.014  |
| Adjusted rate ratio (95% CI, p-value)*    | 1.19 (1.17-1.22, <0.001)                                                        |         | 1.56 (1.53-1.59, <0.001) |         | 1.77 (1.73-1.81, <0.001) |         | 1.80 (1.75-1.83, <0.001) |         | 1.57 (1.53-1.62, <0.001) |         |
| <b>Urologic procedures</b>                |                                                                                 |         |                          |         |                          |         |                          |         |                          |         |
| Number of events                          | 530,257                                                                         | 44,664  | 216,259                  | 57,751  | 144,709                  | 61,969  | 71,419                   | 45,272  | 31,968                   | 25,532  |
| Incidence density rate                    | 57.848                                                                          | 79.306  | 72.899                   | 95.404  | 72.039                   | 102.029 | 65.968                   | 95.685  | 49.921                   | 72.637  |
| Adjusted rate ratio (95% CI, p-value)*    | 1.11 (1.09-1.14, <0.001)                                                        |         | 1.47 (1.44-1.50, <0.001) |         | 1.65 (1.61-1.68, <0.001) |         | 1.64 (1.60-1.68, <0.001) |         | 1.36 (1.32-1.40, <0.001) |         |

\*models adjusted for effect of participant gender, comorbidity, rurality, income quintile and geographic region of residence.



**eTable 6.** Standardized Incidence Ratios (SIR) of Potential Outcomes of Hematuria-Related Investigations (Study Interval Between 2002-2014)

| Diagnosis                    | Men and women |                    | Total sample size | Total person-years | Men    |                    | Total sample size | Total person-years | Women  |                    | Total sample size | Total person-years |
|------------------------------|---------------|--------------------|-------------------|--------------------|--------|--------------------|-------------------|--------------------|--------|--------------------|-------------------|--------------------|
|                              | Number        | SIR (95% CI)       |                   |                    | Number | SIR (95% CI)       |                   |                    | Number | SIR (95% CI)       |                   |                    |
| Bladder cancer               | 5646          | 2.38 (2.32 - 2.44) | 21,495,463        | 2,600,519.0        | 4409   | 2.33 (2.26 - 2.40) | 9,353,443         | 1,245,757.9        | 1237   | 2.17 (2.06 - 2.30) | 12,142,120        | 1,354,762.0        |
| Kidney cancer                | 774           | 0.64 (0.59 - 0.68) | 21,495,463        | 2,600,519.0        | 502    | 0.64 (0.59 - 0.70) | 9,353,443         | 1,245,757.9        | 272    | 0.59 (0.52 - 0.66) | 12,142,120        | 1,354,762.0        |
| Prostate cancer              | n/a           | n/a                |                   |                    | 6683   | 0.75 (0.73 - 0.77) | 9,353,443         | 1,245,757.9        | n/a    | n/a                |                   |                    |
| Benign prostatic hypertrophy | n/a           | n/a                |                   |                    | 61,081 | 2.45 (2.43 - 2.47) | 9,353,443         | 1,245,757.9        | n/a    | n/a                |                   |                    |
| BPH-therapy with 5-ARI       | n/a           | n/a                |                   |                    | 26,983 | 1.33 (1.31 - 1.35) | 9,353,443         | 1,245,757.9        | n/a    | n/a                |                   |                    |

Note: BPH – benign prostatic hypertrophy; n/a – not applicable.

**eTable 7.** Continuous Length of Time That Patients Spend on Each Drug

| <b>Drug type</b>     | <b>Median time on drug (days) (Interquartile Range)</b> |
|----------------------|---------------------------------------------------------|
| Any anticoagulant    | 114 (44-317)                                            |
| ASA                  | 114 (104-293)                                           |
| Apixaban             | 97 (44-194)                                             |
| Dabigatran           | 133 (44-325)                                            |
| Other anti-platelets | 199 (104-390)                                           |
| Rivaroxaban          | 44 (28-171)                                             |
| Warfarin             | 74 (44-152)                                             |
